# Supplementary material for: Iron oxide/graphene oxide nanocomposite synthesis using atmospheric cold plasma
Source: Royal Society of Chemistry journal article supplement (doi:10.1039/d3ra05560d), 2024-01-01
Supplement: d3ra05560d1.pdf [file d3ra05560d1.pdf]

## Supplementary file

### Iron oxide/Graphene oxide nanocomposite synthesis using atmospheric cold plasma

Andjelika Bjelajac,<sup>\*a</sup> Adrian-Marie Phillipe,<sup>a</sup> Jérôme Guillot,<sup>a</sup> Jean-Baptiste Chemin,<sup>a</sup> Patrick Choquet,<sup>a</sup> and Simon Bulou<sup>a</sup>

<sup>a</sup> *Luxembourg Institute of Science and Technology, 28, avenue des Hauts-Fourneaux, L-4365 Esch-sur-Alzette, Luxembourg*

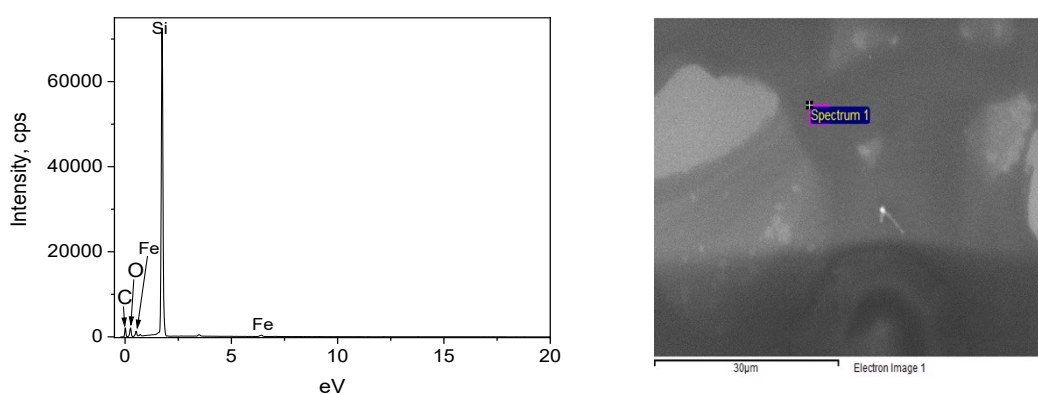

Fig. S1 EDX spectrum of the deposit obtained with plasma, using ethanol as a solvent for Fe precursor
